# Supplementary material for: Tracking the maximum power point of hysteretic perovskite solar cells using a predictive algorithm
Source: Royal Society of Chemistry journal article supplement (doi:10.1039/c7tc03482b), 2017-01-01
Supplement: c7tc03482b1.pdf [file c7tc03482b1.pdf]

## Supporting Information for

# Tracking the maximum power point of hysteretic perovskite solar cells using a predictive algorithm

*Alexander J. Cimaroli<sup>†</sup>, Yue Yu<sup>†</sup>, Changlei Wang, Weiqiang Liao, Lei Guan, Corey R. Grice, Dewei Zhao, and Yanfa Yan\**

Department of Physics and Astronomy, and Wright Center for Photovoltaic Innovation and Commercialization, The University of Toledo, Toledo, Ohio 43606, USA

<sup>†</sup> These authors contributed equally.

### Corresponding Author

\*Email: [yanfa.yan@utoledo.edu](mailto:yanfa.yan@utoledo.edu)

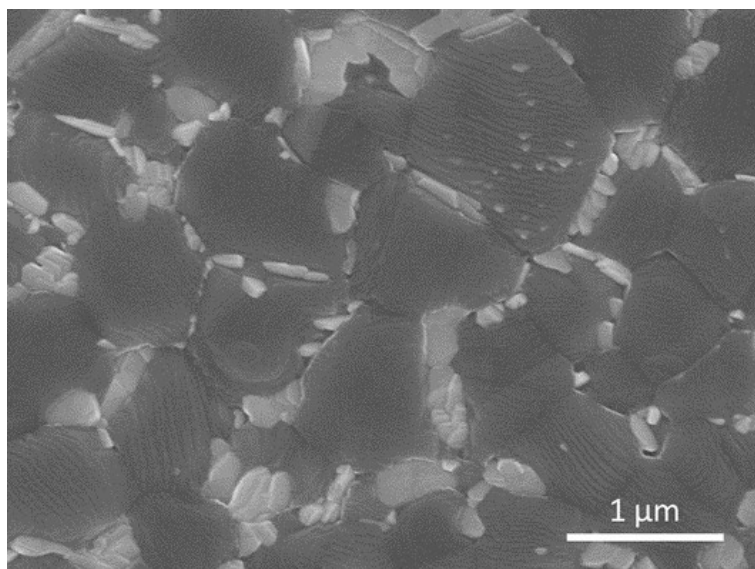

**Fig. S1** Top-view SEM image of a  $\text{MA}_{0.7}\text{FA}_{0.3}\text{PbI}_3$  perovskite thin film on FTO/ $\text{C}_{60}$ -SAM substrate. The bright particles are excessive  $\text{PbI}_2$  formed on surface and along grain boundaries, which are due to the use of  $\text{Pb}(\text{SCN})_2$  additive in precursor solutions.

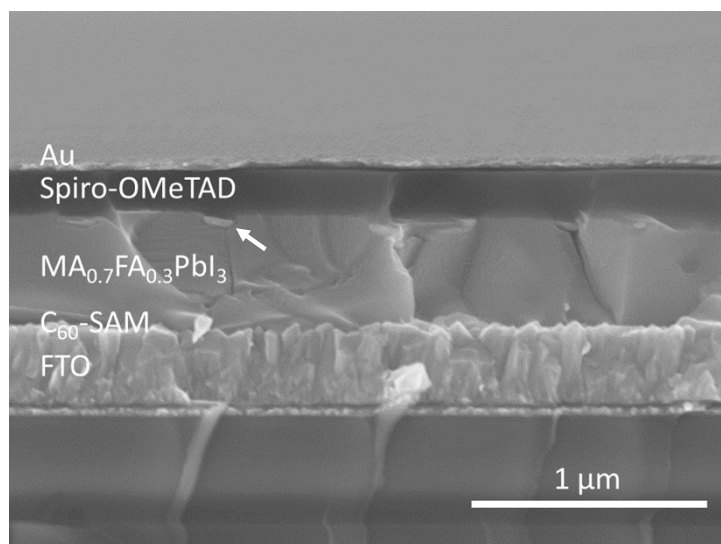

**Fig. S2** Cross-sectional SEM image of a perovskite solar cell with the device structure of FTO/C<sub>60</sub>-SAM/MA<sub>0.7</sub>FA<sub>0.3</sub>PbI<sub>3</sub>/Spiro-OMeTAD/Au. No SnO<sub>2</sub> electron selective layer is used with the intention of preparing perovskite solar cells with large degrees of J-V hysteresis. The bright particle indicated by the white arrow is PbI<sub>2</sub>.
